# Supplementary material
Source: Research Square preprint supplement (doi:10.21203/rs.3.rs-8202171/v1)
Supplement: Supplementary file 1 [file 50b96043bf52b1dba3bda624.docx]

**Table 1**

*Participant Characteristics.*

| Variables | Characteristics | *n* | % |
| --- | --- | --- | --- |
| Gender | Woman  Man | 58  26 | 69.0  31.0 |
| Race/Ethnicity | White  Asian/Asian American  Latinx/Hispanic  Black/African American  Multiracial  Other Ethnicity | 49  11  8  1  11  4 | 58.3  13.1  9.5  1.2  13.1  4.8 |
| Year in University | First/Freshman  Second/Sophomore  Third/Junior  Fourth/Senior | 51  26  5  2 | 60.7  31.0  6.0  2.4 |
| Age | *M* = 19.39 (*SD* = 2.30) | | |
